# Supplementary material for: Elexacaftor/tezacaftor/ivacaftor corrects monocyte microbicidal deficiency in cystic fibrosis
Source: PubMed Central journal article supplement — Eur Respir J. 2023 Apr 3;61(4):2200725. doi: 10.1183/13993003.00725-2022 (PMC10066567; doi:10.1183/13993003.00725-2022), 2023-04-03

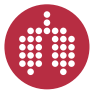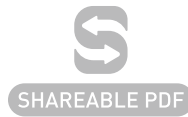

# Elexacaftor/tezacaftor/ivacaftor corrects monocyte microbicidal deficiency in cystic fibrosis

Luca Cavinato<sup>1</sup>, Francesco R. Luly<sup>1</sup>, Valentina Pastore<sup>1</sup>, Daniele Chiappetta<sup>1</sup>, Gloria Sangiorgi<sup>1</sup>, Eva Ferrara<sup>2</sup>, Pia Baiocchi<sup>3</sup>, Giuseppe Mandarello<sup>4</sup>, Giuseppe Cimino<sup>2</sup>, Paola Del Porto<sup>1</sup> and Fiorentina Ascenzioni<sup>1</sup> 

<sup>1</sup>Department of Biology and Biotechnology “Charles Darwin”, Sapienza University of Rome, Rome, Italy. <sup>2</sup>Cystic Fibrosis Reference Center of Lazio Region, Policlinico Umberto I, Rome, Italy. <sup>3</sup>Department of Public Health and Infectious Disease, Sapienza University of Rome, Rome, Italy. <sup>4</sup>Department of Onco-Hematology, Immunotransfusion Service, ASL Viterbo, Rome, Italy.

Corresponding author: Fiorentina Ascenzioni ([fiorentina.ascenzioni@uniroma1.it](mailto:fiorentina.ascenzioni@uniroma1.it))

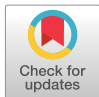

Shareable abstract (@ERSpublications)

In people with cystic fibrosis, elexacaftor/tezacaftor/ivacaftor ameliorates the antimicrobial activity of monocytes against *Pseudomonas aeruginosa* by lowering their exuberant oxidative burst, thus contributing to the improvement of lung disease <http://bit.ly/3hL2Z11>

**Cite this article as:** Cavinato L, Luly FR, Pastore V, et al. Elexacaftor/tezacaftor/ivacaftor corrects monocyte microbicidal deficiency in cystic fibrosis. *Eur Respir J* 2023; 61: 2200725 [DOI: 10.1183/13993003.00725-2022].

This single-page version can be shared freely online.

Copyright ©The authors 2023.

This version is distributed under the terms of the Creative Commons Attribution Non-Commercial Licence 4.0. For commercial reproduction rights and permissions contact [permissions@ersnet.org](mailto:permissions@ersnet.org)

This article has an editorial commentary:  
<https://doi.org/10.1183/13993003.00216-2023>

Received: 5 April 2022  
Accepted: 12 Nov 2022

## Abstract

**Background** Cystic fibrosis (CF), which is caused by mutations in the CF transmembrane conductance regulator (CFTR), is characterised by chronic bacterial lung infection and inflammation. In CF, monocytes and monocyte-derived macrophages have been shown to display defective phagocytosis and antimicrobial activity against relevant lung pathogens, including *Pseudomonas aeruginosa*. Thus, we addressed the effect of CFTR triple modulator therapy (elexacaftor/tezacaftor/ivacaftor (ETI)) on the activity of CF monocytes against *P. aeruginosa*.

**Methods** Monocytes from people with CF (PWCF) before and after 1 and 6 months of ETI therapy were isolated from blood and infected with *P. aeruginosa* to assess phagocytic activity and intracellular bacterial killing. The oxidative burst and interleukin-6 secretion were also determined. Monocytes from healthy controls were also included.

**Results** Longitudinal analysis of the clinical parameters confirmed an improvement of lung function and lung microbiology by ETI. Both the phagocytic and microbicidal deficiencies of CF monocytes also improved significantly, although not completely. Furthermore, we measured an exuberant oxidative burst in CF monocytes before therapy, which was reduced considerably by ETI. This led to an improvement of reactive oxygen species-dependent bactericidal activity. Inflammatory response to bacterial stimuli was also lowered compared with pre-therapy.

**Conclusions** PWCF on ETI therapy, in a real-life setting, in addition to clinical recovery, showed significant improvement in monocyte activity against *P. aeruginosa*, which may have contributed to the overall effect of ETI on pulmonary disease. This also suggests that CF monocyte dysfunctions may be specifically targeted to ameliorate lung function in CF.

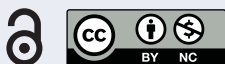

Supplement: ERJ-00725-2022.Shareable.pdf [file ERJ-00725-2022.Shareable.pdf]
